# Supplementary material for: Impact of MWCO and Dopamine/Polyethyleneimine Concentrations on Surface Properties and Filtration Performance of Modified Membranes
Source: PubMed Central journal article supplement (PMC7559832; doi:10.3390/membranes10090239), 2020-09-18
Supplement: membranes-10-00239-s001.pdf [file membranes-10-00239-s001.pdf]

## Supplementary material

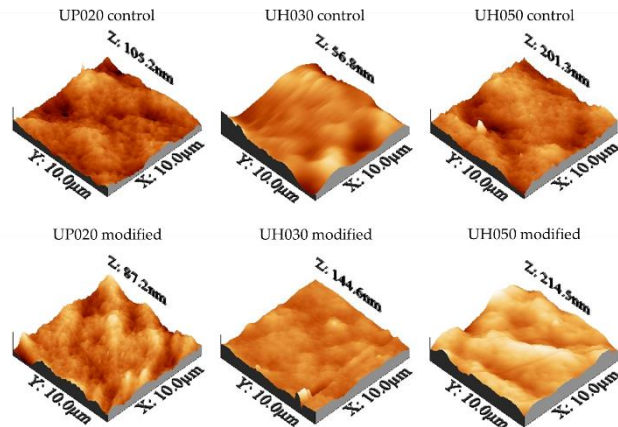

**Figure 1.** AFM images of the control and modified membranes.

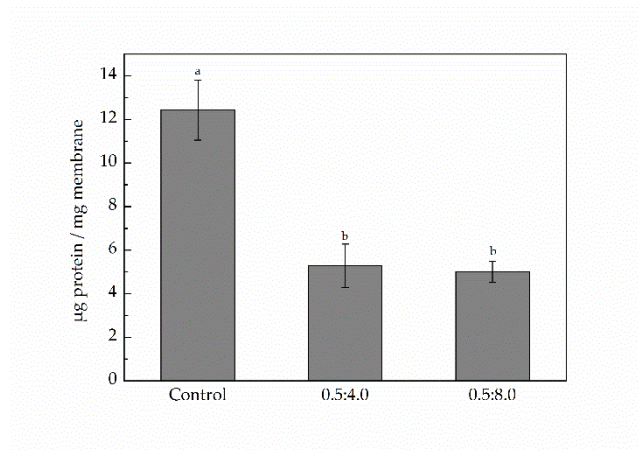

**Figure S2:** Static adsorption test of BSA on the surface of the control and modified membranes. The test was performed for 6 h with a BSA solution concentration of 0.5 g L<sup>-1</sup>. Bars with different letters show statistical difference ( $p < 0.05$ ).

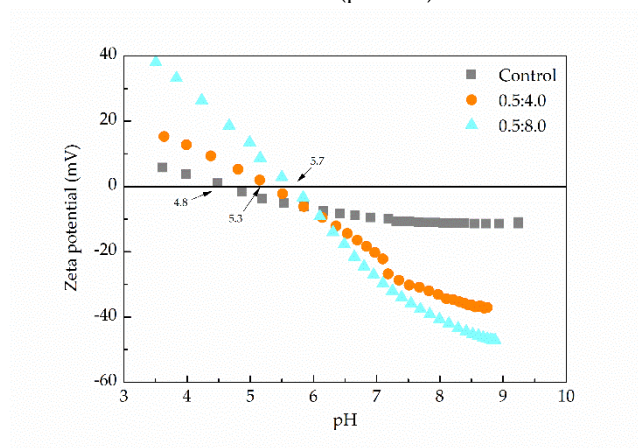

**Figure S3:** Zeta potential of the control and modified membranes. The DA and PEI concentrations used to modify the membranes were 0.5:4.0 and 0.5:8.0 mg mL<sup>-1</sup>.
